# Supplementary material
Source: ML conference proceedings conference paper supplement (https://proceedings.neurips.cc/paper_files/paper/2022/hash/2b2bf329be5da02422a1d15ce4a81fdb-Abstract.html)
Supplement: Supplementary file 1 [file 2b2bf329be5da02422a1d15ce4a81fdb-Supplemental-Conference.zip]

Archive with 2 entries (2 files):
- neurips_2022_supplementary.pdf
- __MACOSX/._neurips_2022_supplementary.pdf
